# Supplementary material
Source: PubMed Central journal article supplement (PMC11588361)
Supplement: NewmanSuppApp.pdf [file NewmanSuppApp.pdf]

## Supplemental materials for

# Enhancing First Trimester Obstetrical Care: The Addition of Point-of-Care Ultrasound

Allison Newman, MD

Mark Berg, MD

*Woodwinds Hospital Family Medicine Residency Program, Department of Family Medicine and Community Health, University of Minnesota Medical School, St Paul, Minnesota*

<https://doi.org/10.1370/afm.3180>

**Acknowledgments:** Woodwinds Family Medicine residency and clinic staff: Nicole Glumac, OB RN care coordinator; Sherri Fong, MPH; Kathryn George, MD; Allison Venzon, MD. This study was supported by the Research Services Hub, in the Department of Family Medicine and Community Health, University of Minnesota Medical School (Junia de Brito, PhD, MPH, MBA).

## References

1. Weile J, Brix J, Moellekaer AB. Is point-of-care ultrasound disruptive innovation? Formulating why POCUS is different from conventional comprehensive ultrasound. *Crit Ultrasound J*. 2018;10(1):25. [10.1186/s13089-018-0106-3](https://doi.org/10.1186/s13089-018-0106-3)
2. AAP Committee on Fetus & Newborn, ACOG Committee on Obstetric Practice. Antepartum care. In: Kilpatrick SJ, Papile LA, Macones GA, eds. *Guidelines for Perinatal Care. American Academy of Pediatrics*; 2017. [10.1542/9781610020886-ch06](https://doi.org/10.1542/9781610020886-ch06)
3. Methods for estimating due date. Committee Opinion No 700. American College of Obstetricians and Gynecologists. Published May 2017. <https://www.acog.org/-/media/project/acog/acogorg/clinical/files/committee-opinion/articles/2017/05/methods-for-estimating-the-due-date.pdf>
4. Perinatal Ultrasound Examination. (Policy paper). American Academy of Family Physicians (AAFP). 2018. [www.aafp.org/about/policies/all/obstetric-ultrasound.html](http://www.aafp.org/about/policies/all/obstetric-ultrasound.html)
5. Recker F, Weber E, Strizek B, Gembruch U, Westerway SC, Dietrich CF. Point-of-care ultrasound in obstetrics and gynecology. *Arch Gynecol Obstet*. 2021;303(4):871-876. [10.1007/s00404-021-05972-5](https://doi.org/10.1007/s00404-021-05972-5)
6. Doubilet PM, Benson CB, Bourne T, et al for the Society of Radiologists in Ultrasound Multispecialty Panel on Early First Trimester Diagnosis of Miscarriage and Exclusion of a Viable Intrauterine Pregnancy. Diagnostic criteria for nonviable pregnancy early in the first trimester. *N Engl J Med*. 2013;369(15):1443-1451. [10.1056/NEJMra1302417](https://doi.org/10.1056/NEJMra1302417)
